# Supplementary material for: Schulische Gesundheitsförderung in pandemischen Zeiten. Ergebnisse der COVID-HL-Schulleitungsstudie
Source: Springer Nature journal article supplement (doi:10.1007/s00103-022-03535-w), 2022-05-06
Supplement: MOESM1 [file 20378920]

Onlinematerial zum Beitrag:

## **Schulische Gesundheitsförderung in pandemischen Zeiten. Ergebnisse der COVID-HL Schulleitungsstudie**

Kevin Dadaczynski<sup>1,2,3</sup>, Orkan Okan<sup>4</sup>, Melanie Messer<sup>5</sup>

<sup>1</sup> Fachbereich Pflege und Gesundheit, Hochschule Fulda, Fulda, Deutschland

<sup>2</sup> Public Health Zentrum (PHZF), Hochschule Fulda, Fulda, Deutschland

<sup>3</sup> Zentrum für Angewandte Gesundheitswissenschaften, Leuphana Universität Lüneburg, Lüneburg, Deutschland

<sup>4</sup> Fakultät für Sport- und Gesundheitswissenschaften, Technische Universität München, München, Deutschland

<sup>5</sup> Abteilung Pflegewissenschaft II, Universität Trier, Deutschland

### **Korrespondenzadresse:**

Prof. Dr. Kevin Dadaczynski  
Hochschule Fulda  
Fachbereich für Pflege und Gesundheit  
Leipziger Straße 123  
36037 Fulda  
Deutschland  
kevin.dadaczynski@pg.hs-fulda.de

### **Inhalt:**

**Tabelle Z1:** Initiale und finale Hauptkomponentenlösung der COVID-19-bezogenen schulischen Gesundheitsförderung

Tabelle Z1: Initiale und finale Hauptkomponentenlösung der COVID-19-bezogenen schulischen Gesundheitsförderung

|                                   |          | Initiale 15-Item-Lösung     | Finale 12-Item-Lösung       |
|-----------------------------------|----------|-----------------------------|-----------------------------|
| KMO                               |          | 0,89                        | 0,87                        |
| Bartlett-Test                     |          | $\chi^2 = 8,942, p < 0,001$ | $\chi^2 = 7,413, p < 0,001$ |
| Faktor Interkorrelation           |          | 0,48-0,55 ( $p < 0,001$ )   | 0,48-0,51 ( $p < 0,001$ )   |
| Items                             | Faktor 1 | 1, 2, 3, 4, 5               | 1, 2, 3, 4, 5               |
|                                   | Faktor 2 | 9, 10, 11, 12, 13, 14, 15   | 6, 7, 8                     |
|                                   | Faktor 3 | 6, 7, 8                     | 11, 12, 13, 14              |
| Eigenwerte                        | Faktor 1 | 5,206                       | 4,510                       |
|                                   | Faktor 2 | 1,330                       | 1,285                       |
|                                   | Faktor 3 | 1,091                       | 1,039                       |
| Erklärte Varianz                  | Faktor 1 | 34,7%                       | 37,6%                       |
|                                   | Faktor 2 | 8,9%                        | 10,7%                       |
|                                   | Faktor 3 | 7,3%                        | 8,7%                        |
| Kommunalitäten (> 0,40)           | Faktor 1 |                             |                             |
|                                   | Faktor 2 | 0,36 (Item 9) -             | 0,44 (Item 4) -             |
|                                   | Faktor 3 | 0,80 (Item 8)               | 0,82 (Item 8)               |
| Faktorladungen (> 0,50)           | Faktor 1 | 0,575-0,768                 | 0,560-0,773                 |
|                                   | Faktor 2 | 0,441-0,665                 | 0,657-0,879                 |
|                                   | Faktor 3 | 0,649-0,868                 | 0,589-0,733                 |
| Reliabilität (Cronbach $\alpha$ ) | Faktor 1 | 0,76                        | 0,76                        |
|                                   | Faktor 2 | 0,73                        | 0,81                        |
|                                   | Faktor 3 | 0,81                        | 0,65                        |
